# Supplementary material for: Effect of Nitrogen Fertilisation and Inoculation with Bradyrhizobium japonicum on the Fatty Acid Profile of Soybean (Glycine max (L.) Merrill) Seeds
Source: MDPI journal article supplement (doi:10.3390/agronomy11050941), 2021-05-10
Supplement: s1 [file s1]

## Article

# Effect of Nitrogen Fertilisation and Inoculation with *Bradyrhizobium japonicum* on the Fatty Acid Profile of Soybean (*Glycine max* (L.) Merrill) Seeds

Ewa Szpunar-Krok, Anna Wondolowska-Grabowska, Dorota Bobrecka-Jamro, Marta Jańczak-Pieniążek, Andrzej Kotecki and Marcin Kozak

**Table S1.** FA composition of *G. max* seeds (g FA · 100 g seeds<sup>-1</sup>), mean values for interaction cultivar × fertilisation.

| Cultivar                 | Fertilisation<br>(kg·ha <sup>-1</sup> N) | C18:0      | C18:1n9    | C18:2n6    | C18:3n6      | C18:3n3    | C14:0        | C16:0      | C16:1        | C20:0        | C20:1        |
|--------------------------|------------------------------------------|------------|------------|------------|--------------|------------|--------------|------------|--------------|--------------|--------------|
| Aldana                   | 0                                        | 3.17 ±0.13 | 20.0 ±3.07 | 52.3 ±1.13 | 0.079 ±0.054 | 8.89 ±0.61 | 0.173 ±0.138 | 12.7 ±1.80 | 0.147 ±0.027 | 0.275 ±0.033 | 0.189 ±0.027 |
|                          | 30                                       | 3.11 ±0.21 | 19.7 ±2.35 | 52.5 ±1.83 | 0.088 ±0.047 | 8.89 ±0.70 | 0.167 ±0.095 | 12.9 ±1.25 | 0.152 ±0.023 | 0.249 ±0.052 | 0.177 ±0.045 |
|                          | 60                                       | 3.14 ±0.27 | 20.3 ±2.97 | 51.9 ±1.87 | 0.073 ±0.044 | 8.78 ±0.89 | 0.154 ±0.103 | 13.1 ±0.94 | 0.170 ±0.050 | 0.252 ±0.027 | 0.169 ±0.033 |
| Annushka                 | 0                                        | 3.35 ±0.28 | 18.3 ±2.54 | 53.4 ±1.22 | 0.088 ±0.044 | 9.07 ±0.76 | 0.162 ±0.085 | 12.8 ±1.65 | 0.134 ±0.027 | 0.314 ±0.080 | 0.204 ±0.063 |
|                          | 30                                       | 3.26 ±0.28 | 17.9 ±1.88 | 53.3 ±1.93 | 0.088 ±0.047 | 9.05 ±0.86 | 0.162 ±0.078 | 13.6 ±1.25 | 0.133 ±0.021 | 0.268 ±0.044 | 0.164 ±0.029 |
|                          | 60                                       | 3.24 ±0.23 | 17.9 ±1.71 | 53.1 ±1.30 | 0.081 ±0.051 | 8.96 ±0.84 | 0.153 ±0.075 | 13.7 ±0.75 | 0.149 ±0.041 | 0.265 ±0.039 | 0.182 ±0.036 |
| Cultivar × Fertilisation |                                          | NS         | NS         | NS         | NS           | NS         | NS           | NS         | NS           | NS           | NS           |

\*Values are expressed as mean ± SD. Means in a column followed by different letters show significant differences ( $p < 0.05$ ) according to the Tukey test. NS not significant.

**Table S2.** FA composition of *G. max* seeds (g FA · 100 g seeds<sup>-1</sup>), mean values for interaction fertilisation × inoculation.

| Fertilisation<br>(kg·ha <sup>-1</sup> N) | Inoculated             | C18:0      | C18:1n9    | C18:2n6    | C18:3n6      | C18:3n3    | C14:0        | C16:0      | C16:1        | C20:0        | C20:1        |
|------------------------------------------|------------------------|------------|------------|------------|--------------|------------|--------------|------------|--------------|--------------|--------------|
| 0                                        | Without<br>inoculation | 3.18 ±0.22 | 18.6 ±3.20 | 52.9 ±1.21 | 0.093 ±0.053 | 8.93 ±0.66 | 0.186 ±0.099 | 13.5 ±1.57 | 0.146 ±0.033 | 0.271 ±0.043 | 0.180 ±0.043 |
|                                          | HiStick®Soy            | 3.33 ±0.19 | 19.7 ±3.24 | 52.9 ±1.43 | 0.075 ±0.033 | 8.97 ±0.78 | 0.126 ±0.094 | 12.2 ±1.91 | 0.136 ±0.031 | 0.322 ±0.090 | 0.213 ±0.060 |
|                                          | Nitra-gina             | 3.27 ±0.28 | 19.1 ±2.45 | 52.7 ±1.77 | 0.081 ±0.061 | 9.04 ±0.69 | 0.190 ±0.142 | 12.5 ±1.52 | 0.139 ±0.017 | 0.293 ±0.042 | 0.197 ±0.038 |
| 30                                       | Without<br>inoculation | 3.19 ±0.28 | 18.5 ±1.49 | 52.8 ±1.22 | 0.079 ±0.050 | 9.00 ±0.77 | 0.158 ±0.089 | 13.9 ±1.23 | 0.151 ±0.021 | 0.258 ±0.068 | 0.177 ±0.047 |
|                                          | HiStick®Soy            | 3.23 ±0.23 | 19.2 ±3.02 | 53.2 ±1.56 | 0.106 ±0.056 | 9.00 ±0.85 | 0.170 ±0.066 | 12.5 ±1.53 | 0.131 ±0.015 | 0.272 ±0.036 | 0.173 ±0.030 |
|                                          | Nitragina              | 3.13 ±0.27 | 18.8 ±2.31 | 52.7 ±1.93 | 0.076 ±0.025 | 8.92 ±0.81 | 0.166 ±0.107 | 13.3 ±0.52 | 0.146 ±0.030 | 0.245 ±0.036 | 0.162 ±0.038 |
| 60                                       | Without<br>inoculation | 3.22 ±0.19 | 19.2 ±2.73 | 52.8 ±1.30 | 0.067 ±0.025 | 9.02 ±0.79 | 0.122 ±0.054 | 13.2 ±1.18 | 0.147 ±0.040 | 0.261 ±0.027 | 0.171 ±0.020 |
|                                          | HiStick®Soy            | 3.19 ±0.21 | 19.3 ±3.24 | 51.9 ±2.39 | 0.086 ±0.061 | 8.71 ±1.08 | 0.201 ±0.090 | 13.5 ±0.60 | 0.177 ±0.058 | 0.253 ±0.031 | 0.179 ±0.039 |
|                                          | Nitragina              | 3.16 ±0.27 | 18.8 ±2.28 | 52.8 ±2.14 | 0.080 ±0.051 | 8.88 ±0.75 | 0.137 ±0.102 | 13.5 ±0.89 | 0.154 ±0.037 | 0.261 ±0.044 | 0.177 ±0.043 |
| Fertilisation × Inoculation              |                        | NS         | NS         | NS         | NS           | NS         | NS           | NS         | NS           | NS           | NS           |

\*Values are expressed as mean ± SD. Means in a column followed by different letters show significant differences (< 0.05) according to the Tukey test. NS not significant.

**Table S3.** FA composition of *G. max* seeds (g FA · 100 g seeds<sup>-1</sup>), mean values for interaction inoculation × years.

| Inoculated          | Years | C18:0       | C18:1n9    | C18:2n6    | C18:3n6       | C18:3n3    | C14:0         | C16:0       | C16:1         | C20:0        | C20:1         |
|---------------------|-------|-------------|------------|------------|---------------|------------|---------------|-------------|---------------|--------------|---------------|
| Without inoculation | 2016  | 3.20 ±0.13  | 17.1 ±1.39 | 54.4 ±0.53 | 0.123 ±0.037  | 9.21 ±0.30 | 0.175±0.037   | 13.8 ±0.42  | 0.124 ±0.016  | 0.263 ±0.017 | 0.167 ±0.022  |
|                     | 2017  | 3.38 ±0.17  | 18.7 ±0.78 | 52.5 ±0.27 | 0.099 ±0.040  | 8.37 ±0.28 | 0.207 ±0.061  | 13.5 ±0.77  | 0.148 ±0.014  | 0.295 ±0.038 | 0.207 ± 0.045 |
|                     | 2018  | 2.91 ±0.14  | 21.8 ±2.94 | 51.8 ±1.10 | 0.050 ±0.030  | 8.42 ±0.33 | 0.171±0.100   | 12.9 ±1.46  | 0.144 ±0.032  | 0.247 ±0.078 | 0.168 ±0.035  |
|                     | 2019  | 3.30 ±0.10  | 17.5 ±0.82 | 52.7 ±0.79 | 0.048 ±0.011  | 9.94 ±0.19 | 0.069±0.056   | 14.0 ±0.49  | 0.176 ±0.037  | 0.248 ±0.043 | 0.163 ±0.033  |
| HiStick®Soy         | 2016  | 3.14 ±0.11  | 17.1 ±1.22 | 54.9 ±0.74 | 0.072 ±0.032  | 9.49 ±0.19 | 0.145±0.016   | 13.3 ±0.28  | 0.124 ±0.011  | 0.253 ±0.010 | 0.165 ±0.006  |
|                     | 2017  | 3.43 ±0.13  | 18.8 ±0.79 | 52.1 ±0.70 | 0.127 ±0.062  | 8.36 ±0.21 | 0.258 ±0.043  | 13.5 ±0.48  | 0.156 ±0.025  | 0.305 ±0.034 | 0.212 ±0.025  |
|                     | 2018  | 3.06 ± 0.18 | 23.9 ±2.24 | 50.7 ±1.57 | 0.090 ±0.062  | 7.90 ±0.62 | 0.168 ±0.091  | 11.1 ±1.15  | 0.158 ±0.080  | 0.320 ±0.050 | 0.225 ±0.059  |
|                     | 2019  | 3.38 ±0.16  | 17.8 ±0.92 | 53.0 ±0.92 | 0.067 ±0.025  | 9.82 ±0.36 | 0.093±0.082   | 13.0 ±1.14  | 0.154 ± 0.017 | 0.250 ±0.048 | 0.150 ±0.034  |
| Nitragina           | 2016  | 3.13 ±0.11  | 17.1 ±1.16 | 54.4 ±0.87 | 0.100 ±0.042  | 9.36 ±0.19 | 0.160 ±0.039  | 13.4 ± 0.35 | 0.130 ±0.019  | 0.258 ±0.016 | 0.175 ±0.010  |
|                     | 2017  | 3.36 ±0.18  | 18.5 ±0.79 | 51.9 ±0.52 | 0.118 ± 0.053 | 8.34 ±0.31 | 0.289 ± 0.121 | 13.5 ±0.37  | 0.164 ±0.026  | 0.300 ±0.032 | 0.215 ±0.045  |
|                     | 2018  | 2.88 ±0.18  | 22.1 ±1.77 | 51.6 ±1.60 | 0.050 ±0.025  | 8.31 ±0.47 | 0.146 ±0.084  | 12.5 ±1.56  | 0.147 ±0.040  | 0.262 ±0.062 | 0.183 ±0.043  |
|                     | 2019  | 3.38 ±0.24  | 18.1 ±1.03 | 53.1 ±1.44 | 0.048 ±0.010  | 9.77 ±0.29 | 0.062 ±0.077  | 13.1 ±1.44  | 0.145 ±0.020  | 0.243 ±0.039 | 0.143 ±0.026  |
| Inoculation × Years |       | NS          | NS         | NS         | NS            | NS         | NS            | NS          | NS            | NS           | NS            |

\*Values are expressed as mean ± SD. Means in a column followed by different letters show significant differences (p<0.05) according to the Tukey test. NS not significant.

**Table S4.** Content of SFA, UFA, MUFA and PUFA (g FA·100 g seeds<sup>-1</sup>) as well as the ratio of SFA/UFA and C18:2n6/C18: 3n3 in *G. max* seeds, mean values for interaction cultivar × fertilisation.

| Cultivar                 | Fertilisation<br>(kg·ha <sup>-1</sup> N) | SFA         | MUFA        | UFA         | PUFA        | SFA/UFA     | C18:2n6/C18:3n3 |
|--------------------------|------------------------------------------|-------------|-------------|-------------|-------------|-------------|-----------------|
| Aldana                   | 0                                        | 17.6 ± 1.40 | 20.5 ± 3.06 | 82.6 ± 1.81 | 61.7 ± 2.47 | 0.21 ± 0.03 | 5.91 ± 0.39     |
|                          | 30                                       | 17.6 ± 1.51 | 20.2 ± 2.38 | 81.6 ± .99  | 61.3 ± 2.03 | 0.23 ± 0.03 | 5.92 ± 0.47     |
|                          | 60                                       | 17.8 ± 1.18 | 20.8 ± 3.00 | 81.9 ± 1.22 | 61.6 ± 1.78 | 0.22 ± 0.02 | 5.96 ± 0.50     |
| Annushka                 | 0                                        | 17.8 ± 1.96 | 18.8 ± 2.58 | 81.1 ± 1.72 | 62.4 ± 2.31 | 0.23 ± 0.03 | 5.91 ± 0.40     |
|                          | 30                                       | 18.4 ± 1.34 | 18.4 ± 1.88 | 81.3 ± 1.45 | 62.8 ± 1.81 | 0.23 ± 0.02 | 5.94 ± 0.41     |
|                          | 60                                       | 18.8 ± 1.49 | 18.4 ± 1.76 | 81.7 ± 1.71 | 63.2 ± 1.97 | 0.22 ± 0.03 | 5.96 ± 0.48     |
| Cultivar × Fertilisation |                                          | NS          | NS          | NS          | NS          | NS          | NS              |

\*Values are expressed as mean ± SD. Means in a column followed by different letters show significant differences ( $p < 0.05$ ) according to the Tukey test. NS not significant.

**Table S5.** Content of SFA, UFA, MUFA and PUFA (g FA·100 g seeds<sup>-1</sup>) as well as the ratio of SFA/UFA and C18:2n6/C18: 3n3 in *G. max* seeds, mean values for interaction cultivar × inoculation.

| Cultivar)              | Inoculated          | SFA         | MUFA        | UFA         | PUFA        | SFA/UFA     | C18:2n6/C18:3n3 |
|------------------------|---------------------|-------------|-------------|-------------|-------------|-------------|-----------------|
| Aldana                 | Without inoculation | 17.7 ± 1.91 | 20.2 ± 2.87 | 82.1 ± 1.89 | 61.4 ± 2.42 | 0.22 ± 0.03 | 5.90 ± 0.42     |
|                        | HiStick®Soy         | 17.1 ± 1.84 | 20.8 ± 3.23 | 81.8 ± 1.54 | 61.3 ± 2.25 | 0.22 ± 0.02 | 5.9 ± 0.49      |
|                        | Nitragina           | 18.2 ± 1.31 | 20.4 ± 2.30 | 82.2 ± 1.80 | 62.0 ± 1.51 | 0.22 ± 0.03 | 5.94 ± 0.44     |
| Annushka               | Without inoculation | 18.9 ± 1.07 | 18.2 ± 1.60 | 81.1 ± 1.30 | 62.7 ± 1.97 | 0.23 ± 0.02 | 5.93 ± 0.46     |
|                        | HiStick®Soy         | 18.2 ± 1.99 | 18.9 ± 2.70 | 81.8 ± 1.70 | 62.9 ± 2.01 | 0.22 ± 0.03 | 5.97 ± 0.45     |
|                        | Nitragina           | 17.9 ± 1.68 | 18.4 ± 1.79 | 81.2 ± 1.83 | 62.7 ± 2.21 | 0.23 ± 0.03 | 5.91 ± 0.38     |
| Cultivar × Inoculation |                     | NS          | NS          | NS          | NS          | NS          | NS              |

\*Values are expressed as mean ± SD. Means in a column followed by different letters show significant differences ( $p < 0.05$ ) according to the Tukey test. NS not significant.

**Table S6.** Content of SFA, UFA, MUFA and PUFA (g FA·100 g seeds<sup>-1</sup>) as well as the ratio of SFA/UFA and C18:2n6/C18: 3n3 in *G. max* seeds, mean values for interaction inoculation × years.

| Inoculated          | Year | SFA         | MUFA        | UFA         | PUFA        | SFA/UFA     | C18:2n6/C18:3n3 |
|---------------------|------|-------------|-------------|-------------|-------------|-------------|-----------------|
| Without inoculation | 2016 | 18.2 ± 0.63 | 17.5 ± 1.25 | 81.7 ± 0.79 | 64.2 ± 0.74 | 0.22 ± 0.01 | 5.91 ± 0.15     |
|                     | 2017 | 19.2 ± 0.90 | 19.2 ± 0.94 | 80.2 ± 0.89 | 64.4 ± 1.15 | 0.25 ± 0.01 | 6.28 ± 0.23     |
|                     | 2018 | 16.8 ± 1.49 | 22.3 ± 1.24 | 83.0 ± 2.45 | 64.4 ± 0.98 | 0.21 ± 0.04 | 6.16 ± 0.27     |
|                     | 2019 | 18.9 ± 0.90 | 17.9 ± 0.9  | 81.4 ± 0.95 | 61.2 ± 0.31 | 0.23 ± 0.02 | 5.30 ± 0.13     |
| HiStick®Soy         | 2016 | 17.5 ± 0.32 | 17.5 ± 1.34 | 81.8 ± 0.39 | 61.0 ± 0.21 | 0.22 ± 0.01 | 5.79 ± 0.07     |
|                     | 2017 | 19.2 ± 0.94 | 19.3 ± 0.84 | 80.3 ± 0.72 | 60.9 ± 0.61 | 0.25 ± 0.01 | 6.23 ± 0.23     |
|                     | 2018 | 15.8 ± 1.76 | 24.5 ± 1.44 | 83.3 ± 2.11 | 59.3 ± 2.15 | 0.20 ± 0.03 | 6.44 ± 0.36     |
|                     | 2019 | 18.2 ± 1.36 | 18.3 ± 0.66 | 81.6 ± 1.01 | 59.9 ± 2.54 | 0.23 ± 0.02 | 5.40 ± 0.14     |
| Nitragina           | 2016 | 17.9 ± 0.48 | 17.5 ± 1.15 | 82.0 ± 0.53 | 61.1 ± 1.55 | 0.22 ± 0.01 | 5.82 ± 0.06     |
|                     | 2017 | 19.5 ± 0.49 | 19.1 ± 0.48 | 80.4 ± 0.84 | 63.4 ± 0.89 | 0.24 ± 0.01 | 6.23 ± 0.21     |
|                     | 2018 | 16.8 ± 1.83 | 22.5 ± 1.77 | 83.6 ± 2.32 | 63.1 ± 1.05 | 0.20 ± 0.03 | 6.22 ± 0.41     |
|                     | 2019 | 18.0 ± 1.35 | 18.5 ± 1.19 | 81.0 ± 1.58 | 62.9 ± 1.76 | 0.23 ± 0.02 | 5.44 ± 0.11     |
| Inoculation × Years |      | NS          | NS          | NS          | NS          | NS          | NS              |

\*Values are expressed as mean ± SD. Means in a column followed by different letters show significant differences ( $p < 0.05$ ) according to the Tukey test. NS not significant.
